# Supplementary material for: LGI1-antibody encephalitis is characterised by frequent, multifocal clinical and subclinical seizures
Source: PubMed Central journal article supplement (PMC5558811; doi:10.1016/j.seizure.2017.05.017), 2017-08
Supplement: mmc3.pdf [file mmc3.pdf]

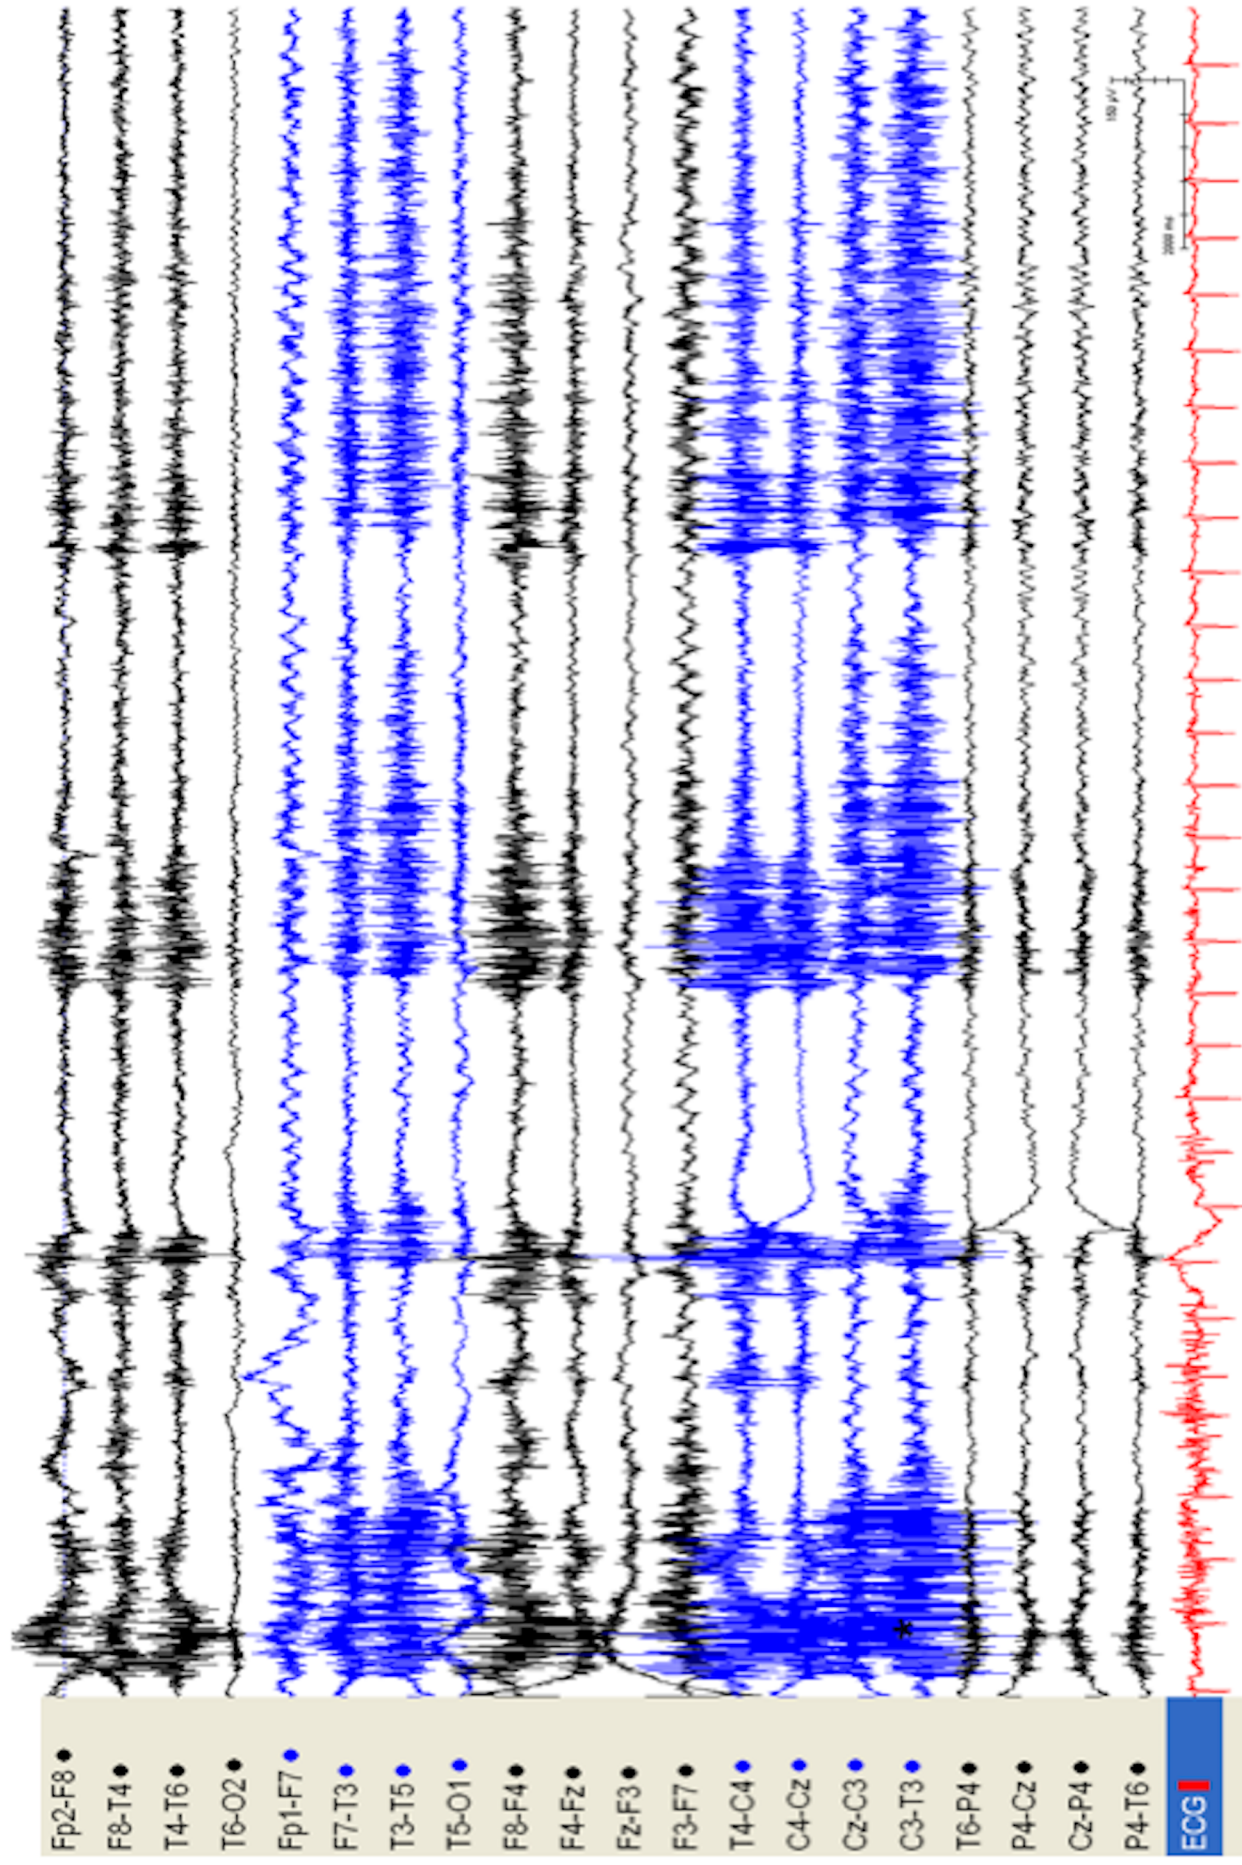

Supplementary Figure 3
